# Supplementary material for: Multi-ancestry study of the genetics of problematic alcohol use in >1 million individuals
Source: PubMed Central journal article supplement — medRxiv. 2023 Jan 30:2023.01.24.23284960. Preprint. [Version 2] doi: 10.1101/2023.01.24.23284960 (PMC9901058; doi:10.1101/2023.01.24.23284960), 2023-01-30

**Supplementary Figure 1. Manhattan and QQ plots for PAU/AUD meta-analyses in different ancestries.** a, PAU meta-analysis in European ancestry. b, AUD meta-analysis in African ancestry. c, AUD in Latin Americans from MVP. d, PAU meta-analysis in South Asian ancestry.

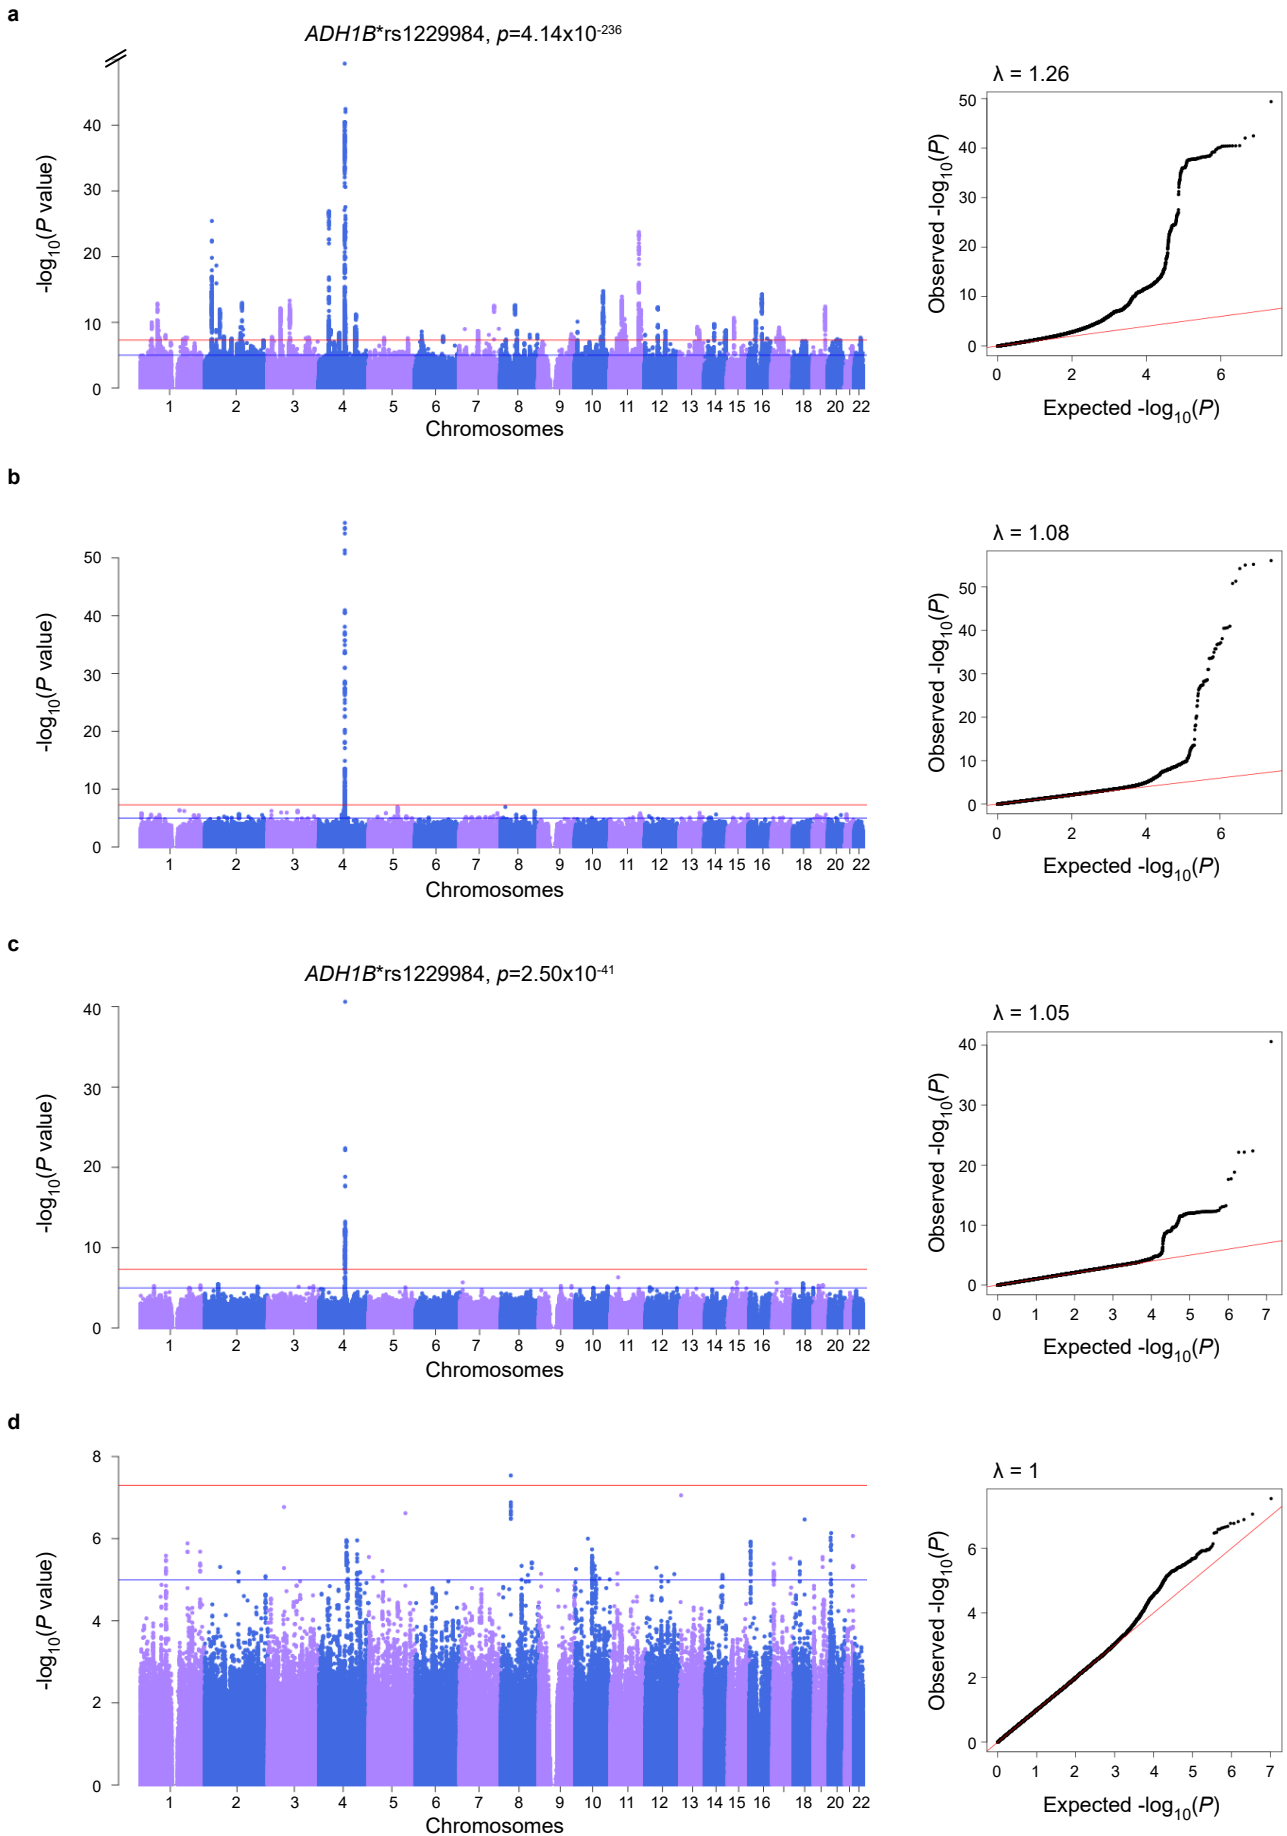

Supplementary Figure 5. Phenome-wide associations with PAU PRS in PsycheMERGE EUR samples.

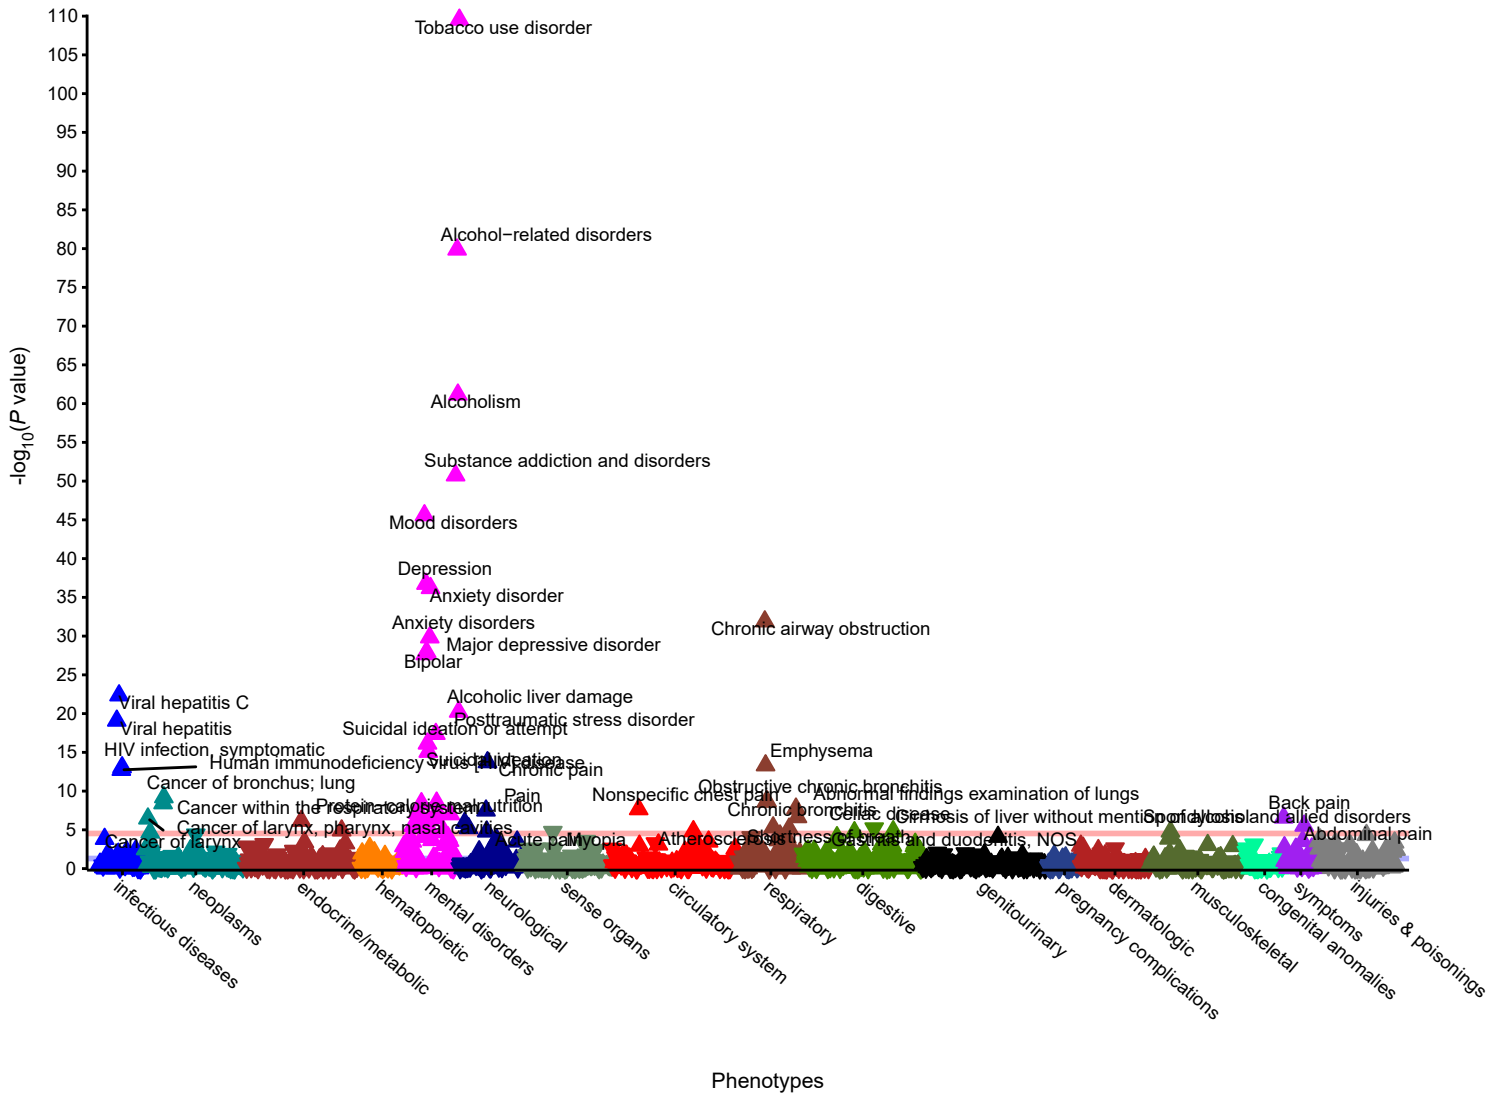

Supplementary Figure 6. Phenome-wide associations with AUD PRS in PsycheMERGE AFR samples.

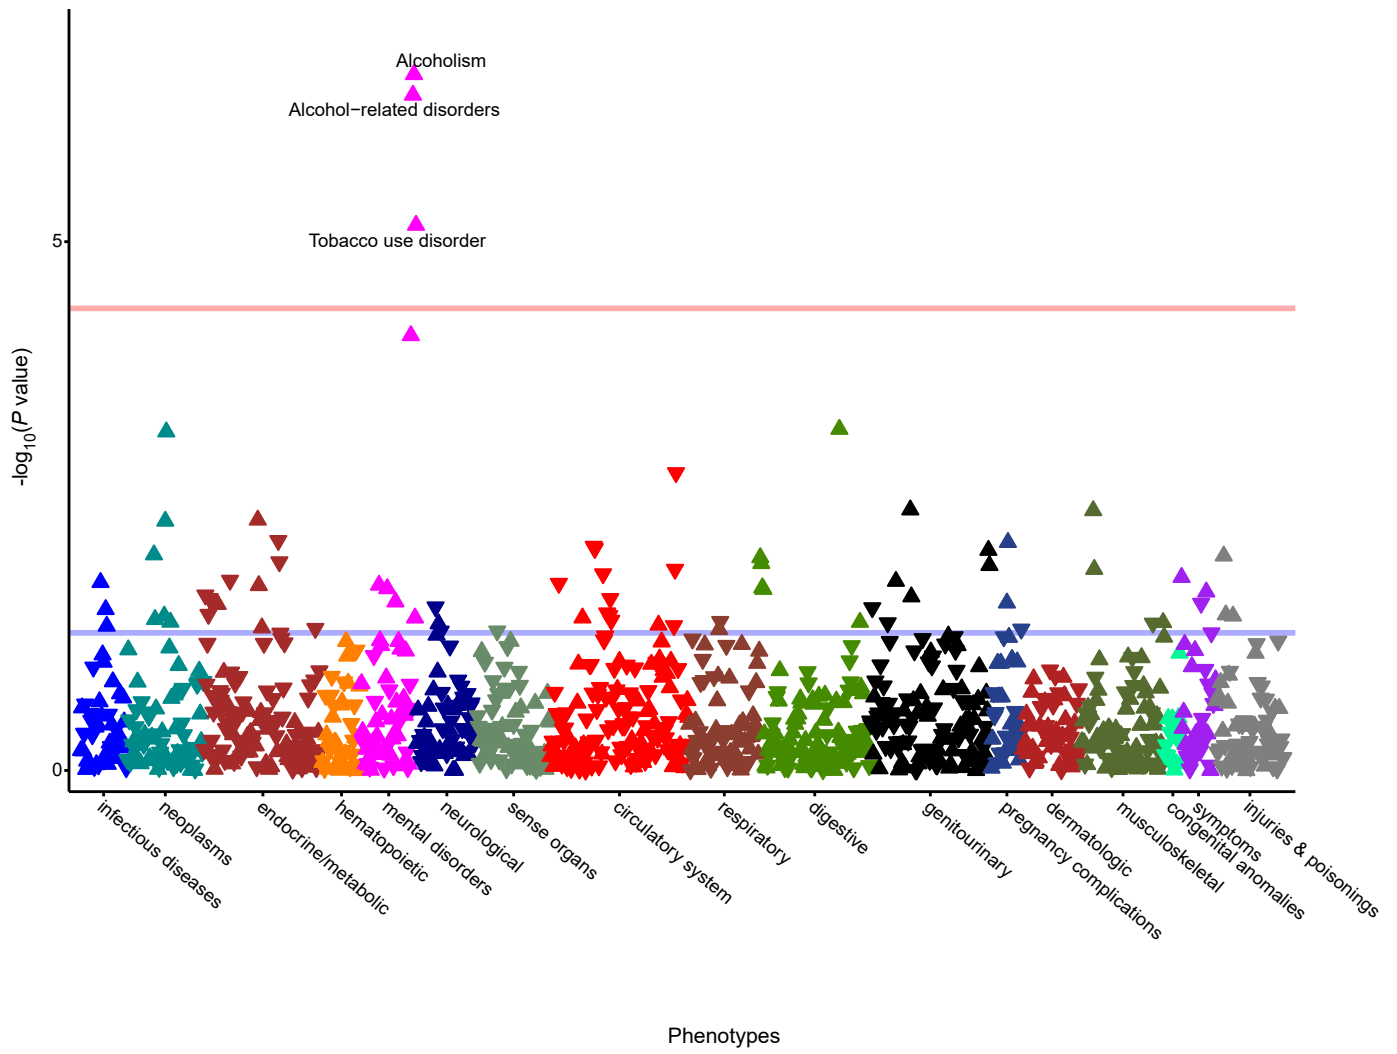

Supplementary Figure 7. Phenome-wide associations with PAU PRS in Yale-Penn EUR samples.

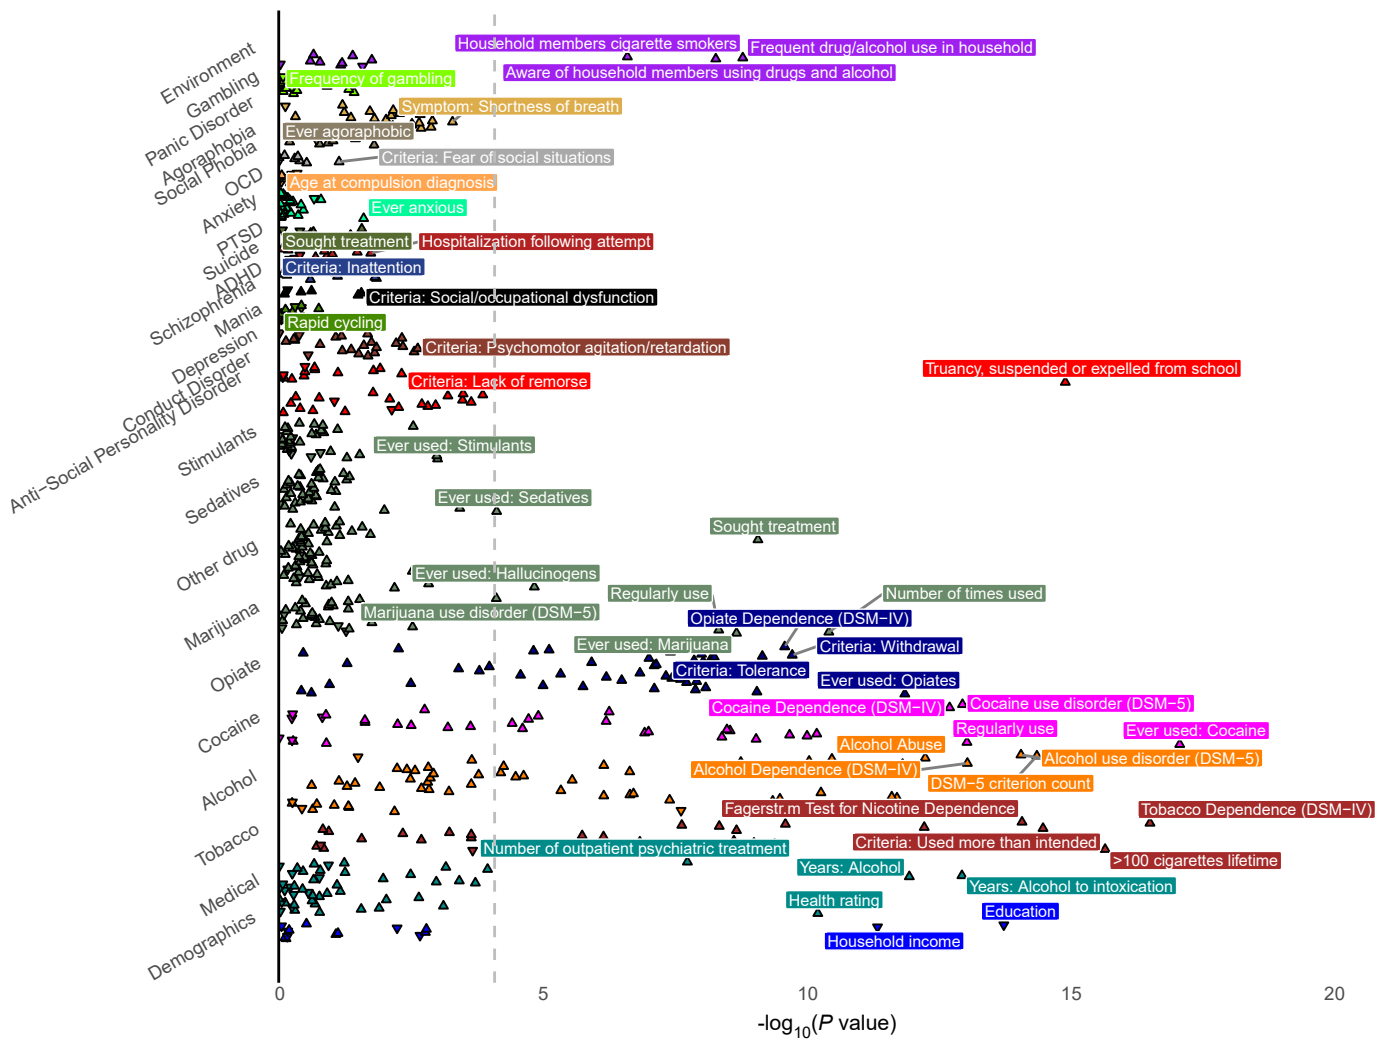

Supplementary Figure 8. Phenome-wide associations with AUD PRS in Yale-Penn AFR samples.

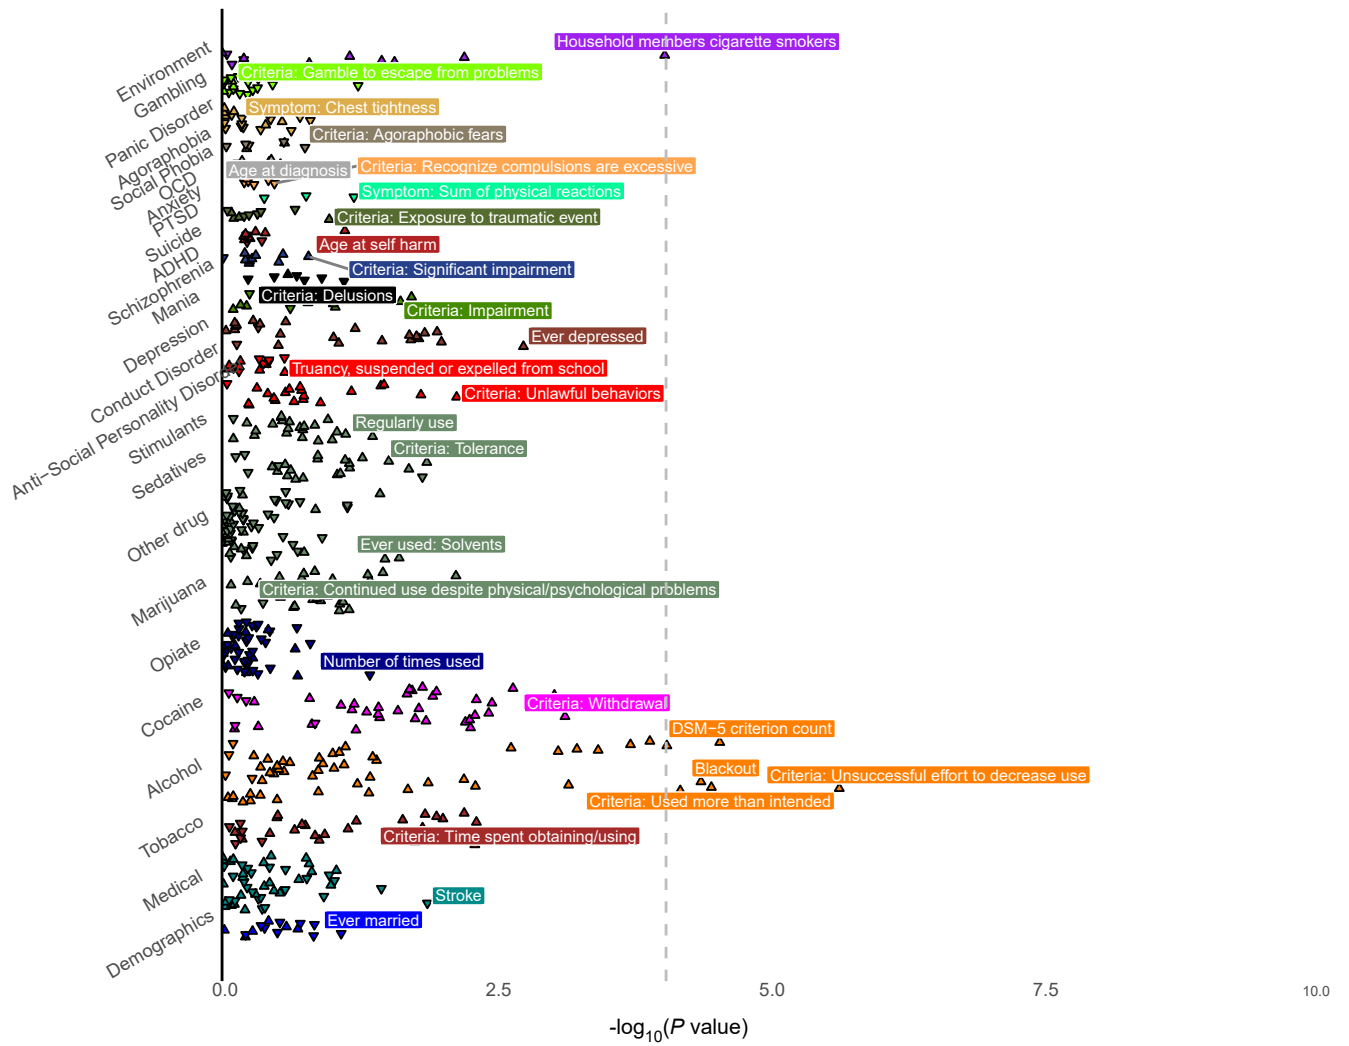

Supplement: media-1.pdf [file media-1.pdf]
